# Supplementary material for: omicsGAT: Graph Attention Network for Cancer Subtype Analyses
Source: MDPI journal article supplement (doi:10.3390/ijms231810220), 2022-09-06
Supplement: s1 [file s1]

# Supplementary Materials for “omicsGAT: Graph Attention Network for Cancer Subtype Analyses”

## 1 Tables

Table S1: Sets of hyperparameters in omicsGAT for cancer outcome prediction

| Hyperparameter                                       | Selection Set         |
|------------------------------------------------------|-----------------------|
| No. of features selected using correlation           | [128, 256, 512, 1024] |
| Embedding size of a head                             | [4, 8, 16, 32, 64]    |
| No. of heads                                         | [4, 8, 16, 32, 64]    |
| No. of neighbors of a sample in the adjacency matrix | [5, 10, 20, 40]       |

Table S2: omicsGAT’s hyperparameter selection for ‘H3K27M-gliomas’ single-cell clustering. The bold hyperparameters are selected for the clustering task based on the least reconstruction loss of the decoder.

| Hyperparameter                                 | Selection Set                    |
|------------------------------------------------|----------------------------------|
| No. of PCA components (features) selected      | [50, 100, 150, <b>200</b> , 400] |
| Embedding size of a head                       | [4, <b>8</b> , 12, 16, 32, 64]   |
| No. of heads                                   | [4, <b>8</b> , 12, 16, 32, 64]   |
| No. of neighbors of a node in adjacency matrix | [5, <b>10</b> , 20, 40, 70]      |
| No. of FC layers                               | [2, <b>3</b> , 4]                |

Table S3: omicsGAT’s hyperparameter selection for ‘SARS-CoV-2 Antibodies’ single-cell clustering. The bold hyperparameters are selected for the clustering task based on the least reconstruction loss of the decoder.

| Hyperparameter                                 | Selection Set                    |
|------------------------------------------------|----------------------------------|
| No. of PCA components (features) selected      | [50, 100, <b>150</b> , 200, 400] |
| Embedding size of a head                       | [4, 8, <b>12</b> , 16, 32, 64]   |
| No. of heads                                   | [4, 8, <b>12</b> , 16, 32, 64]   |
| No. of neighbors of a node in adjacency matrix | [5, 10, 20, 40, <b>70</b> ]      |
| No. of FC layers                               | [2, <b>3</b> , 4]                |

Table S4: The clustering performance on SARS-CoV-2 antibodies scRNA-seq data. The NMI and ARI scores of omicsGAT Clustering and baseline methods are reported in the table. Hierarchical clustering was computed with ‘Euclidean’ distance and ‘Ward’ linkage. Mean NMI and ARI scores with standard deviation are reported for k-means clustering (run 10 times).

| Matrix Type (Clustering Type)             | NMI           | NMI SD | ARI           | ARI SD |
|-------------------------------------------|---------------|--------|---------------|--------|
| gene expression (hierarchical)            | 0.5558        | -      | 0.4655        | -      |
| gene expression (k-means)                 | 0.5923        | 0.0419 | 0.5012        | 0.0626 |
| PCA components (hierarchical)             | 0.5920        | -      | 0.5167        | -      |
| PCA components (k-means)                  | 0.6409        | 0.0035 | 0.5524        | 0.0032 |
| DNN-based autoencoder (hierarchical)      | 0.5240        | -      | 0.4147        | -      |
| DNN-based autoencoder (k-means)           | 0.6029        | 0.0002 | 0.5005        | 0.0002 |
| GCN-based autoencoder (hierarchical)      | 0.2870        | -      | 0.1606        | -      |
| GCN-based autoencoder (k-means)           | 0.2979        | 0.0002 | 0.1726        | 0.0002 |
| SC3s                                      | 0.6164        | -      | 0.5223        | -      |
| adjacency matrix (hierarchical)           | 0.3696        | -      | 0.2739        | -      |
| <b>omicsGAT embeddings</b> (hierarchical) | <b>0.6677</b> | -      | <b>0.6730</b> | -      |

## 2 Figures

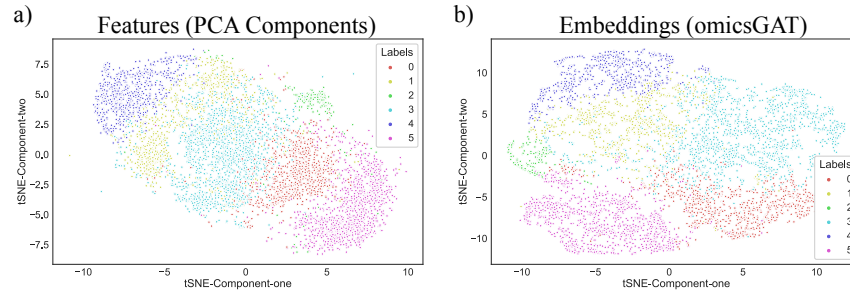

Figure S1: **tSNE plots** of the (a) PCA components generated from the ‘SARS-CoV-2 antibodies’ scRNA-seq data and (b) omicsGAT generated embeddings for cell clustering.
